# Supplementary material for: Potentiometric and UV-Vis spectrophotometric titrations for evaluation of the antioxidant capacity of chicoric acid
Source: Royal Society of Chemistry journal article supplement (doi:10.1039/d0ra01248c), 2020-01-01
Supplement: d0ra01248c1.pdf [file d0ra01248c1.pdf]

*Electronic Supplementary Information (ESI) for*

**Potentiometric and UV-Vis spectrophotometric  
titrations for evaluation of the antioxidant capacity of  
chicoric acid**

Haiqing Yi,<sup>a</sup> Yan Cheng,<sup>a</sup> Yu Zhang,<sup>a</sup> Qingji Xie<sup>\*a</sup> and Xiaoping Yang<sup>b</sup>

<sup>a</sup>Key Laboratory of Chemical Biology and Traditional Chinese Medicine Research (Ministry of Education),  
College of Chemistry and Chemical Engineering, Hunan Normal University, Changsha 410081, China

\* E-mail: [xieqj@hunnu.edu.cn](mailto:xieqj@hunnu.edu.cn) (Q. Xie)

<sup>b</sup>Key Laboratory of Study and Discovery of Small Targeted Molecules of Hunan Province, School of Medicine,  
Hunan Normal University, Changsha 410013, China

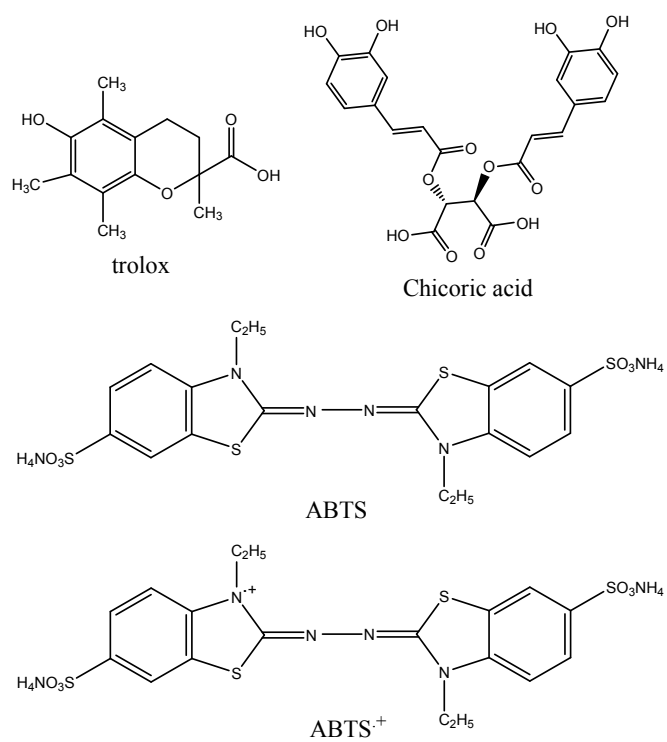

**Scheme S1.** The chemical structures of trolox, ChA, ABTS, and ABTS<sup>·+</sup>.

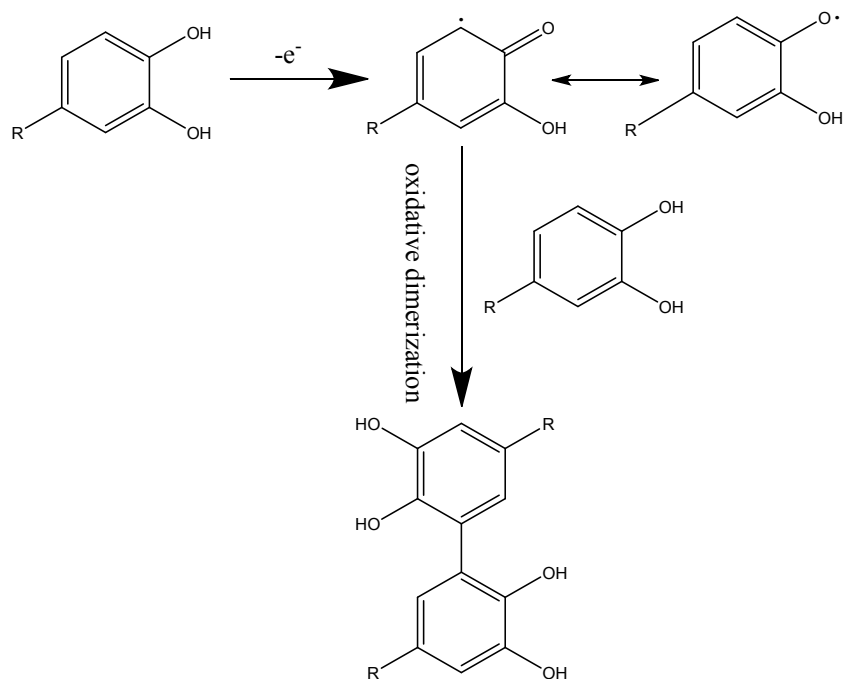

**Scheme S2.** Possible mechanism of the oxidation and dimerization of a catechol structure at high pH (the dimerization at other available phenyl carbon atoms is also possible. R is an appropriate substituent group)<sup>1</sup>. Moreover, the pH-dependent nucleophilic attack of one hydroxyl group of catechol structure to the available phenyl carbon atoms of the *o*-benzoquinone structure is also possible, like the oxidation of dopamine<sup>2</sup>.

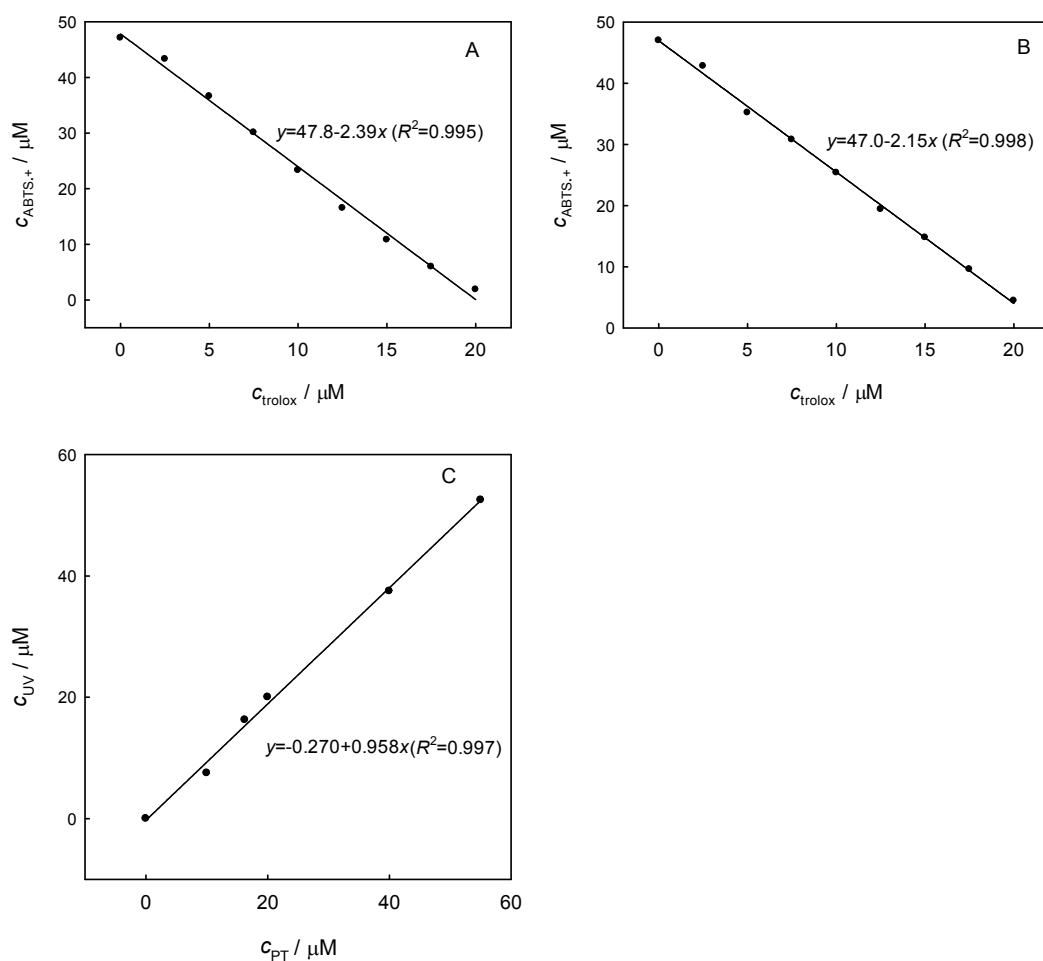

**Fig. S1.** Curve of trolox concentration versus  $\text{ABTS}\cdot+$  concentration obtained from potentiometric titration (A) or from spectrophotometric titration (B). Here, trolox was titrated into the  $\text{ABTS}\cdot+$  solution when the potential (A) or absorbance (B) was recorded, and the concentration of unreacted  $\text{ABTS}\cdot+$  corresponding to each added trolox concentration can be worked out by the Nernst equation (A) or by Lambert-Beer's law (B). Relationship between the ChA concentrations consumed at end points by spectrophotometric ( $c_{\text{UV}}$ ) and potentiometric ( $c_{\text{PT}}$ ) titrations of ChA into  $\text{ABTS}\cdot+$  at different concentrations (C).

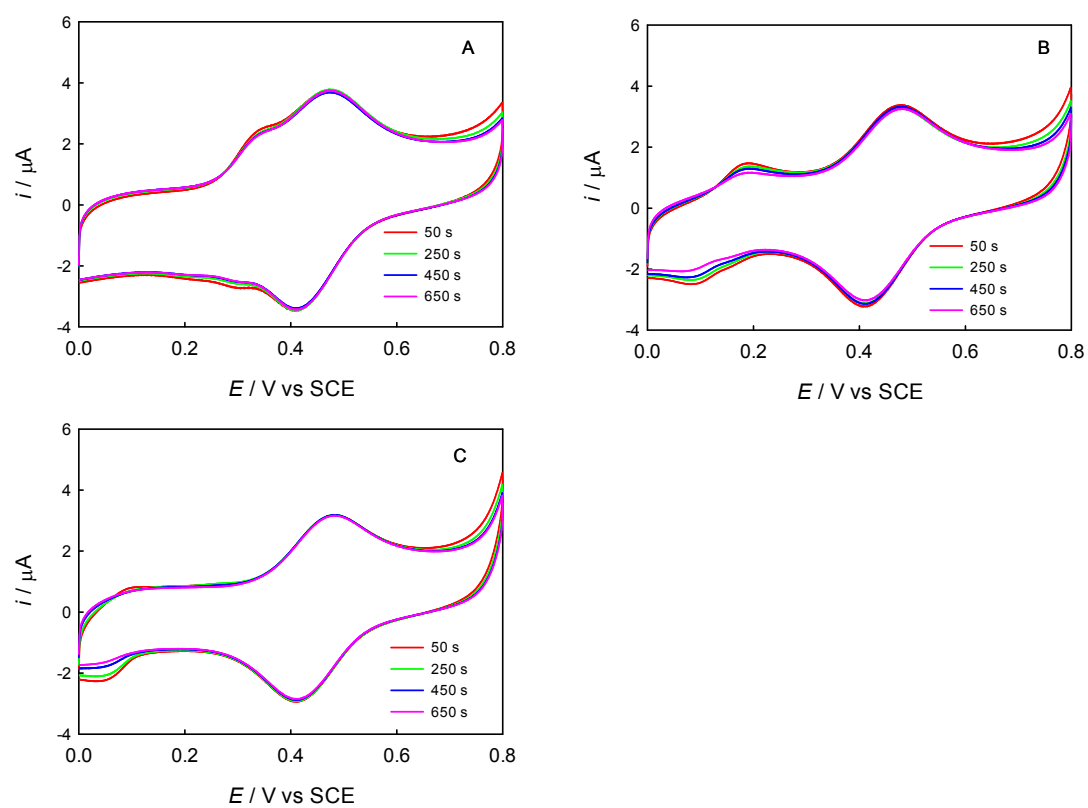

**Fig. S2.** CV curves on GCE at different time after titrating 25  $\mu\text{M}$  ChA into 0.1 M phosphate buffer at pH 5.0 (A), 7.4 (B), or 9.0 (C) containing 0.1 M  $\text{Na}_2\text{SO}_4$ , 117  $\mu\text{M}$   $\text{ABTS}^{\cdot+}$  and 58.0  $\mu\text{M}$  ABTS. Scan rate: 100 mV/s; initial potential: 0 V.

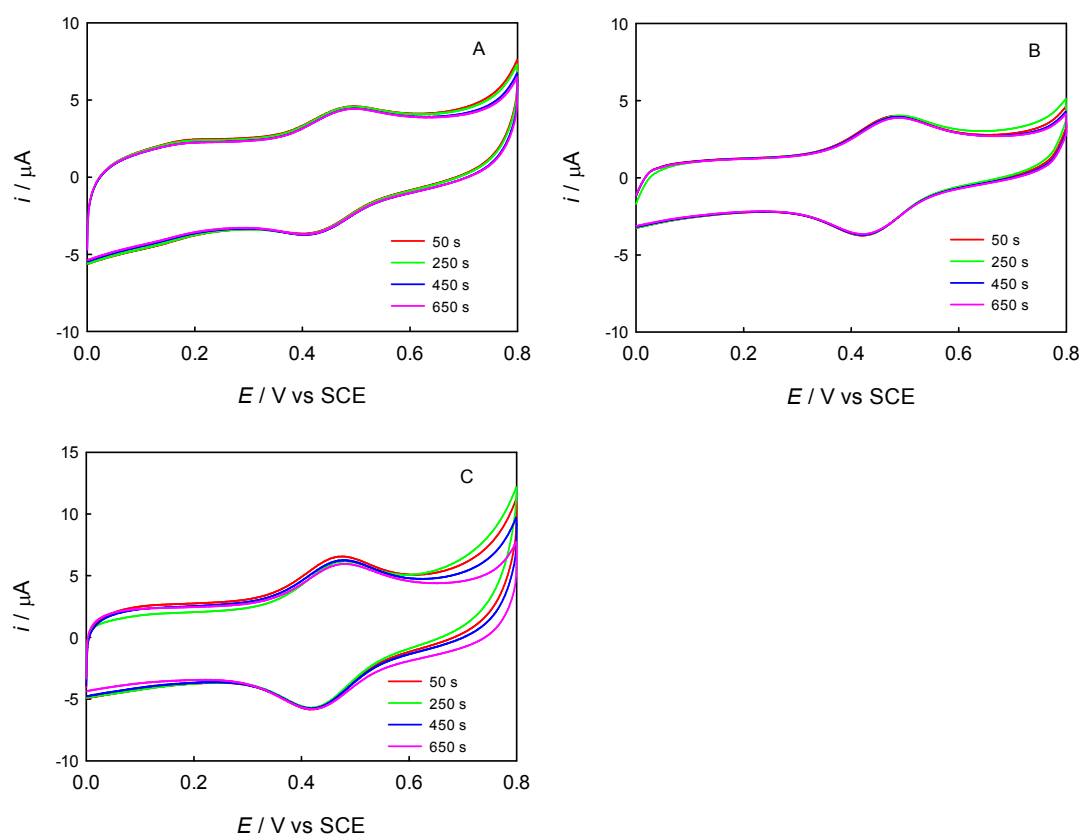

**Fig. S3.** CV curves on GCE at different time after titrating 50  $\mu\text{M}$  trolox into 0.1 M phosphate buffer at pH 5.0 (A), 7.4 (B), or 9.0 (C) containing 0.1 M  $\text{Na}_2\text{SO}_4$ , 117  $\mu\text{M}$   $\text{ABTS}^{\cdot+}$  and 58.0  $\mu\text{M}$  ABTS. Scan rate: 100 mV/s; initial potential: 0 V.

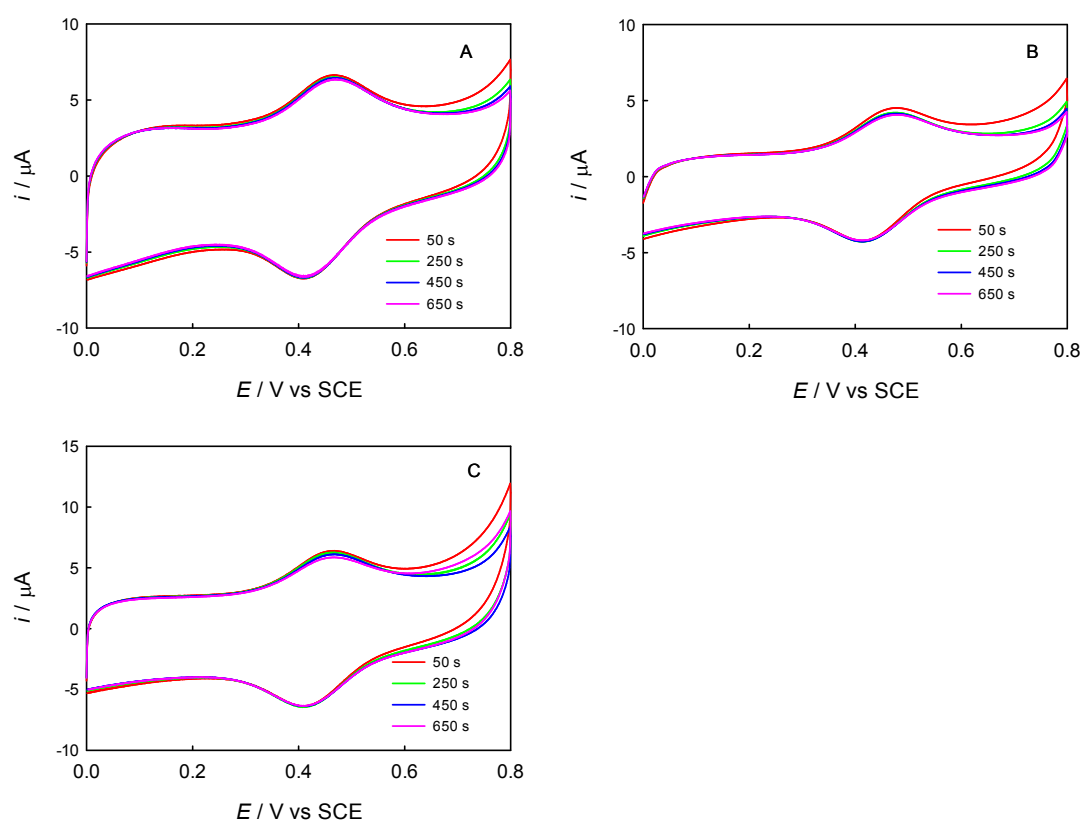

**Fig. S4.** CV curves on GCE at different time after adding 117 μM ABTS<sup>•+</sup> and 58.0 μM ABTS into 0.1 M phosphate buffer at pH 5.0 (A), 7.4 (B), or 9.0 (C) containing 0.1 M Na<sub>2</sub>SO<sub>4</sub>. Scan rate: 100 mV/s; initial potential: 0 V.

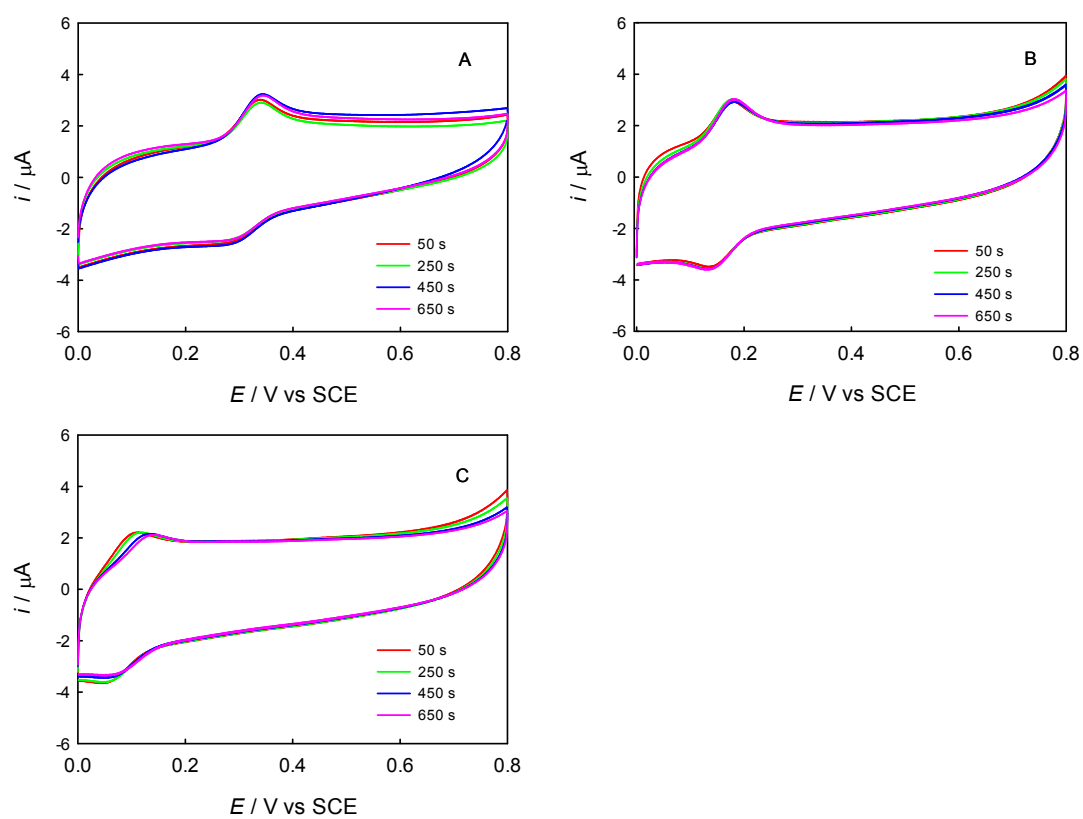

**Fig. S5.** CV curves on GCE at different time after adding 25  $\mu\text{M}$  ChA into 0.1 M phosphate buffer at pH 5.0 (A), 7.4 (B), or 9.0 (C) containing 0.1 M  $\text{Na}_2\text{SO}_4$ . Scan rate: 100 mV/s; initial potential: 0 V.

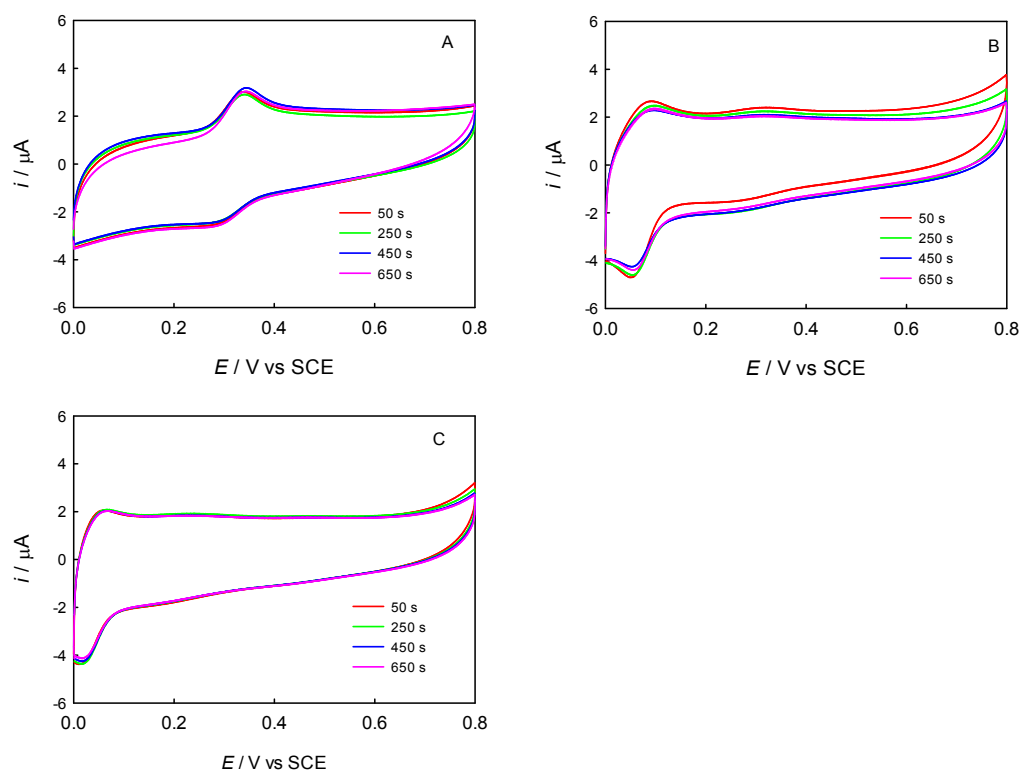

**Fig. S6.** CV curves on GCE at different time after adding 50  $\mu\text{M}$  trolox into 0.1 M phosphate buffer at pH 5.0 (A), 7.4 (B), or 9.0 (C) containing 0.1 M  $\text{Na}_2\text{SO}_4$ . Scan rate: 100 mV/s; initial potential: 0 V.

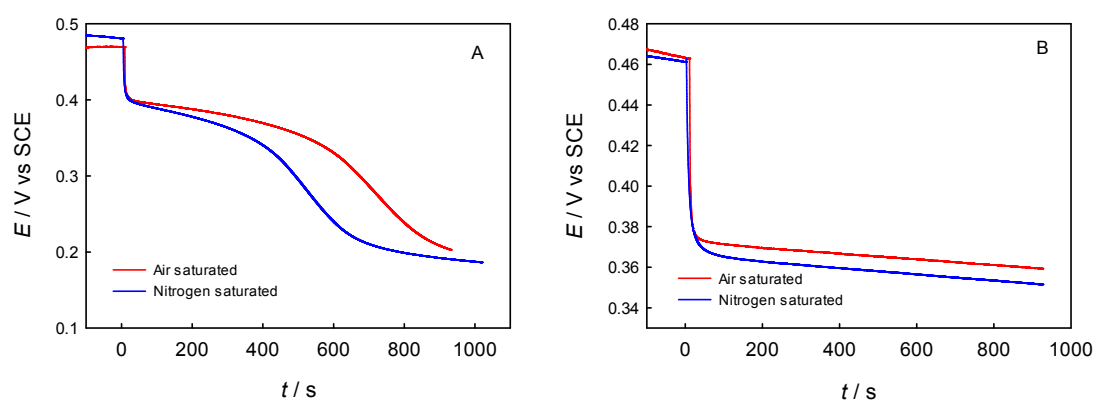

**Fig. S7.** Potentiometric titration kinetics curves for a single dose of 25  $\mu\text{M}$  ChA (A) or 50  $\mu\text{M}$  trolox (B) at 0 s into 0.1 M phosphate buffer at pH 7.4 containing 0.1 M  $\text{Na}_2\text{SO}_4$ , 117  $\mu\text{M}$   $\text{ABTS}^{\cdot+}$  and 58.0  $\mu\text{M}$  ABTS under nitrogen saturated and air saturated conditions.

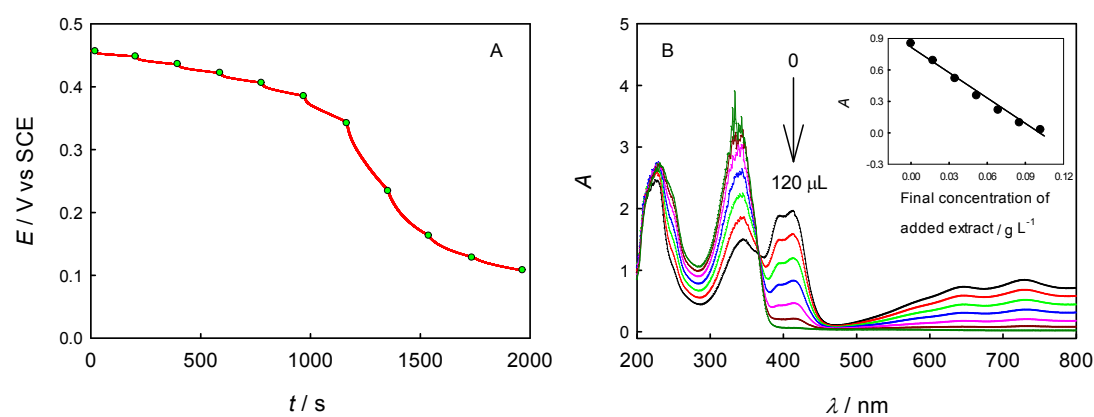

**Fig. S8.** (A) Potentiometric titration curves (A) on GCE for the successive additions (indicated by green spheres) of *Echinacea* extract (addition of 20.0  $\mu L$  of 3.50 g/L original extract for each) into 4.0 mL of 0.1 M phosphate buffer (pH 7.4) containing 0.1 M  $Na_2SO_4$ , 33.6  $\mu M$  ABTS and 53.9  $\mu M$   $ABTS^{\cdot+}$ . (B) Spectrophotometric titration of *Echinacea* extract (addition of 20.0  $\mu L$  of 3.50 g/L original extract for each) into 4.0 mL of 0.1 M phosphate buffer (pH 7.4) containing 0.1 M  $Na_2SO_4$ , 32.8  $\mu M$  ABTS and 54.7  $\mu M$   $ABTS^{\cdot+}$ , and the relationship of the peak absorbance at 734 nm versus final concentration of added extract (inset).

**References** (The numbering here is valid only for the Supporting Information)

- 1 E. F. Newair, R. Abdel-Hamid and P. A. Kilmartin, *Electroanalysis*, 2017, **29**, 850-860.
- 2 Y. L. Li, M. L. Liu, C. H. Xiang, Q. J. Xie and S. Z. Yao, *Thin Solid Films*, 2006, **497**, 270-278.
